# Supplementary material for: Novel Mean Track Length-Driven 3D Framework via COLMAP for Architectural Heritage Photogrammetry
Source: Research Square preprint supplement (doi:10.21203/rs.3.rs-8709145/v1), 2026-02-12
Supplement: Supplementary file 1 [file c766aa815f1cf4d438c5e343.docx]

| 01  02  03  04  05  06  07  08  09  10  11  12  13  14  15  16  17  18  19  20  21  22  23  24  25  26  27  28  29  30  31  32  33  34  35  36  37  38  39  40  41  42  43  44  45  46  47  48  49  50  51  52  53  54  55  56  57  58  59  60  61  62  63  64  65  66  67  68  69  70  71  72 | **import** os  **import** shutil    # ==============================  # 1. Set source directory path (Desktop/AS)  # ==============================  source_folder **=** os.path.join(os.path.expanduser("~"), "Desktop", "AS")    # ==============================  # 2. Locate the single numerically named subfolder  # ==============================  subfolders **=** [      f **for** f **in** os.listdir(source_folder)  **if** os.path.isdir(os.path.join(source_folder, f)) **and** f.isdigit()  ]    **if** len(subfolders) !**=** 1:      print("❌ The AS directory must contain exactly ONE numerically named subfolder")      print("Detected subfolders:", subfolders)      exit()    subfolder **=** subfolders[0]  subfolder_path **=** os.path.join(source_folder, subfolder)    # ==============================  # 3. Identify image files (supports DNG and common formats)  # ==============================  valid_extensions **=** ('.jpg', '.jpeg', '.png', '.bmp', '.dng')    image_files **=** sorted([      f **for** f **in** os.listdir(subfolder_path)  **if** f.lower().endswith(valid_extensions)  ])    **if** len(image_files) **==** 0:      print("❌ No JPG / DNG images found in the numeric subfolder")      exit()    # ==============================  # 4. Determine the number of copies based on the folder number  # ==============================  copy_count **=** int(subfolder)    folder_names **=** list("ABCDEFGHIJKLMNOPQRSTUVWXYZ")  folder_names **=** folder_names[:copy_count]    # ==============================  # 5. Create folders and copy images  # ==============================  **for** i **in** range(copy_count):      folder_name **=** folder_names[i]      folder_path **=** os.path.join(source_folder, folder_name)    **if** **not** os.path.exists(folder_path):          os.makedirs(folder_path)        # Step size rules  **if** i **==** 0:          step **=** 2  **elif** i **==** 1:          step **=** 3  **else**:          step **=** i **+** 2        group **=** image_files[::step]    **for** img **in** group:          src **=** os.path.join(subfolder_path, img)          dst **=** os.path.join(folder_path, img)          shutil.copy(src, dst)    print("✅ Copying completed (DNG / JPG supported)") |
| --- | --- |
